# Supplementary material for: Association between Early Immune-Related Adverse Events and Survival in Patients Treated with PD-1/PD-L1 Inhibitors
Source: MDPI journal article supplement (doi:10.3390/jcm12030736), 2023-01-17
Supplement: s1 [file s1]

## Supplementary Table S1. Search terms

The following terms were searched in [Title/Abstract]: (“nivolumab”[Supplementary Concept] OR “Nivolumab”[tiab] OR “Opdivo”[tiab] OR “MDX-1106”[tiab] OR “ONO-4538”[tiab] OR “BMS-936558”[tiab] OR “NIVO”[tiab] OR “pembrolizumab”[Supplementary Concept] OR “pembrolizumab”[tiab] OR “lambrolizumab”[tiab] OR “keytruda”[tiab] OR “MK-3475”[tiab] OR “SCH 900475”[tiab] OR “avelumab”[Supplementary Concept] OR “Avelumab”[tiab] OR “MSB0010718C”[tiab] OR “MPDL3280A”[Supplementary Concept] OR “MPDL3280A”[tiab] OR “atezolizumab”[tiab] OR “Tecentriq”[tiab] OR “RG7446”[tiab] OR “RO5541267”[tiab] OR “Durvalumab”[tiab] OR “MEDI4736”[tiab] OR “MEDI-4736”[tiab] OR checkpoint inhibitor\*[tiab] OR “PD-1”[tiab] OR “PDL1”[tiab] OR “immunotherapy”[tiab] OR “immune checkpoint”[tiab]) AND (“Drug-Related Side Effects and Adverse Reactions” [MeSH Terms] OR “Side Effects of Drugs”[tiab] OR “Drug Side Effects”[tiab] OR “Drug Side Effect”[tiab] OR “Effects, Drug Side”[tiab] OR “Side Effect, Drug”[tiab] OR “Side Effects, Drug”[tiab] OR “Adverse Drug Reaction”[tiab] OR “Adverse Drug Reactions”[tiab] OR “Drug Reaction, Adverse”[tiab] OR “Drug Reactions, Adverse”[tiab] OR “Reactions, Adverse Drug”[tiab] OR “Adverse Drug Event”[tiab] OR “Adverse Drug Events”[tiab] OR “Drug Event, Adverse”[tiab] OR “Drug Events, Adverse”[tiab] OR “Drug Toxicity”[tiab] OR “Toxicity, Drug”[tiab] OR “Drug Toxicities”[tiab] OR “Toxicities, Drug”[tiab] OR immune-related adverse event\*[tiab] OR adverse event\* [tiab]) AND (“Treatment Outcome”[MeSH Terms] OR “Outcome, Treatment”[tiab] OR “Patient-Relevant Outcome”[tiab] OR “Outcome, Patient-Relevant”[tiab] OR “Outcomes, Patient-Relevant”[tiab] OR “Patient Relevant Outcome”[tiab] OR “Patient-Relevant Outcomes”[tiab] OR “Clinical Effectiveness”[tiab] OR “Effectiveness, Clinical”[tiab] OR “Treatment Effectiveness”[tiab] OR “Effectiveness, Treatment”[tiab] OR “Rehabilitation Outcome”[tiab] OR “Outcome, Rehabilitation”[tiab] OR “Treatment Efficacy”[tiab] OR “Efficacy, Treatment”[tiab] OR “Clinical Efficacy”[tiab] OR “Efficacy, Clinical”[tiab] OR “survival”[tiab] OR “prognosis”[tiab] OR “prognostic”[tiab] OR “efficacy” [tiab] OR “outcome” [tiab]) AND (“Early” [tiab] OR “Earlier” [tiab] OR “early-onset”).

**Supplementary Table S2.** The NewcastleOttawa Scale (NOS) quality assessment of the enrolled studies.

| Study ID         | SELECTION                                        |                                               |                                   |                                                                                      | COMPARABILITY                                                        | OUTCOME                  |                                                          |                                            | Total |
|------------------|--------------------------------------------------|-----------------------------------------------|-----------------------------------|--------------------------------------------------------------------------------------|----------------------------------------------------------------------|--------------------------|----------------------------------------------------------|--------------------------------------------|-------|
|                  | Representative-<br>ness of the<br>exposed cohort | Selection<br>of the non-<br>exposed<br>cohort | Ascertain-<br>ment of<br>exposure | Ascertainment<br>that outcome of<br>interest was not<br>present at start of<br>study | Comparability of<br>cohorts on the<br>basis of design or<br>analysis | Assessment<br>of outcome | Was follow-up<br>long enough for<br>outcomes to<br>occur | Adequacy<br>of follow-<br>up of<br>cohorts |       |
| Aso, 2020        | b*                                               | a*                                            | a*                                | b                                                                                    | a*+b*                                                                | a*                       | a*                                                       | a*                                         | 8     |
| Haratani, 2018   | b*                                               | a*                                            | a*                                | b                                                                                    | a*                                                                   | a*                       | b                                                        | b*                                         | 6     |
| Hosoya,2020      | b*                                               | a*                                            | a*                                | a*                                                                                   | a*+b*                                                                | a*                       | b                                                        | d                                          | 7     |
| Ricciuti, 2019   | b*                                               | a*                                            | a*                                | b                                                                                    | a*                                                                   | a*                       | a*                                                       | d                                          | 6     |
| Cortellini, 2019 | b*                                               | a*                                            | a*                                | b                                                                                    | a*+b*                                                                | a*                       | b                                                        | b*                                         | 7     |
| Ahn, 2019        | b*                                               | a*                                            | a*                                | b                                                                                    | a*+b*                                                                | a*                       | b                                                        | b*                                         | 7     |
| Verzoni, 2019    | b*                                               | a*                                            | a*                                | b                                                                                    | a*+b*                                                                | a*                       | b                                                        | d                                          | 6     |
| Ishihara, 2019   | b*                                               | a*                                            | a*                                | b                                                                                    | a*+b*                                                                | a*                       | b                                                        | d                                          | 6     |
| Masuda,2019      | b*                                               | a*                                            | a*                                | b                                                                                    | a*                                                                   | a*                       | a*                                                       | d                                          | 6     |
| Teraoka,2017     | b*                                               | a*                                            | a*                                | a*                                                                                   | a*+b*                                                                | a*                       | b                                                        | b*                                         | 7     |
| Fukihara,2019    | b*                                               | a*                                            | a*                                | b                                                                                    | a*+b*                                                                | a*                       | b                                                        | b*                                         | 7     |

\* represents one point is scored

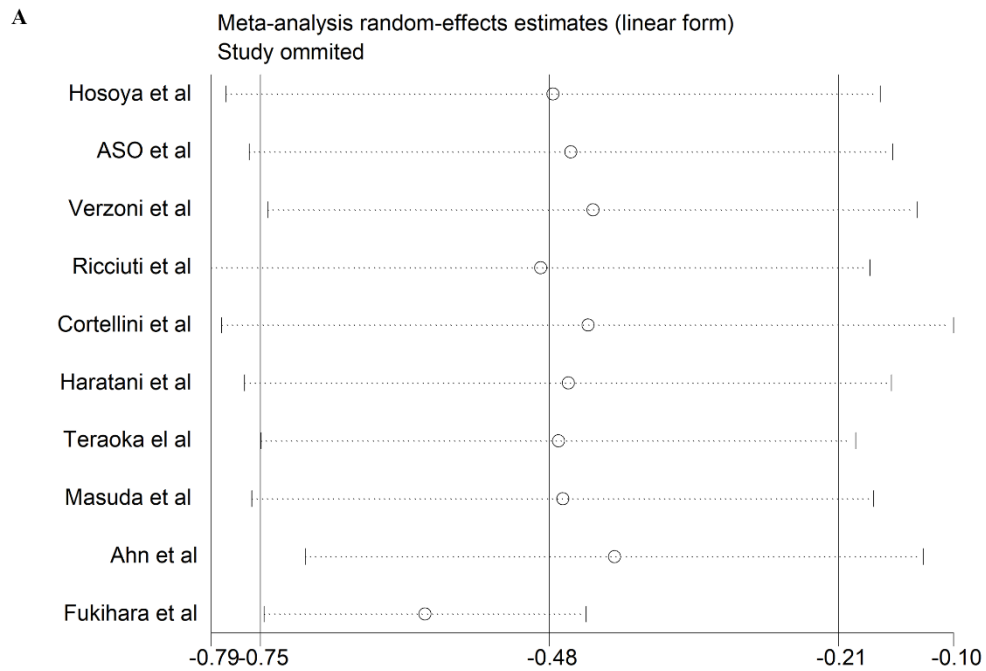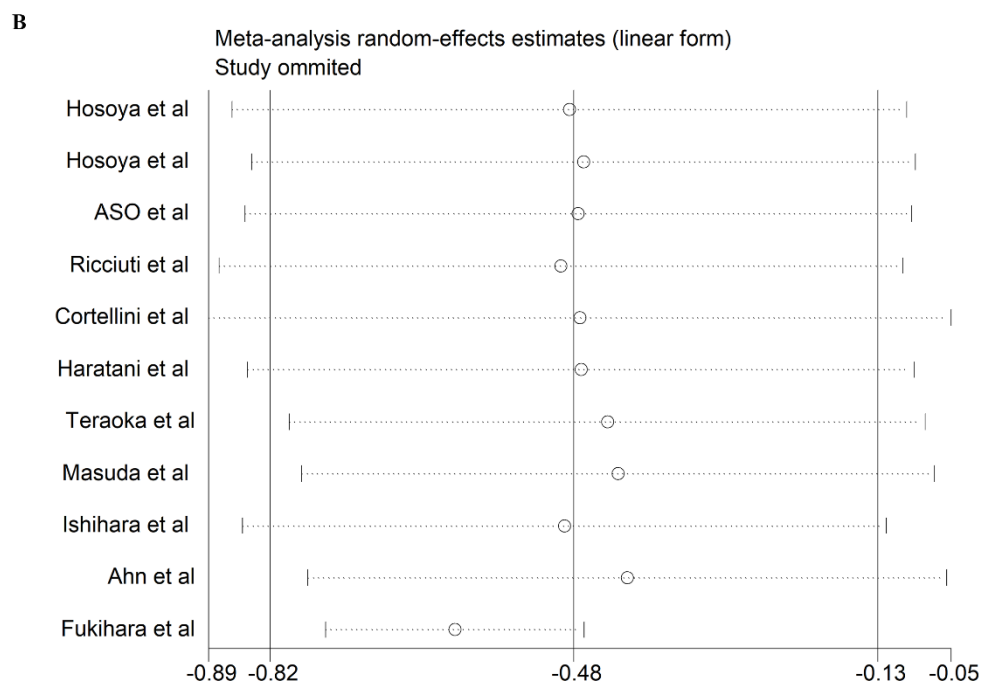

**Supplementary Figure S1. The sensitivity analysis of the impact of each individual study on the pooled effect. A, Overall survival; B, progression-free survival.**

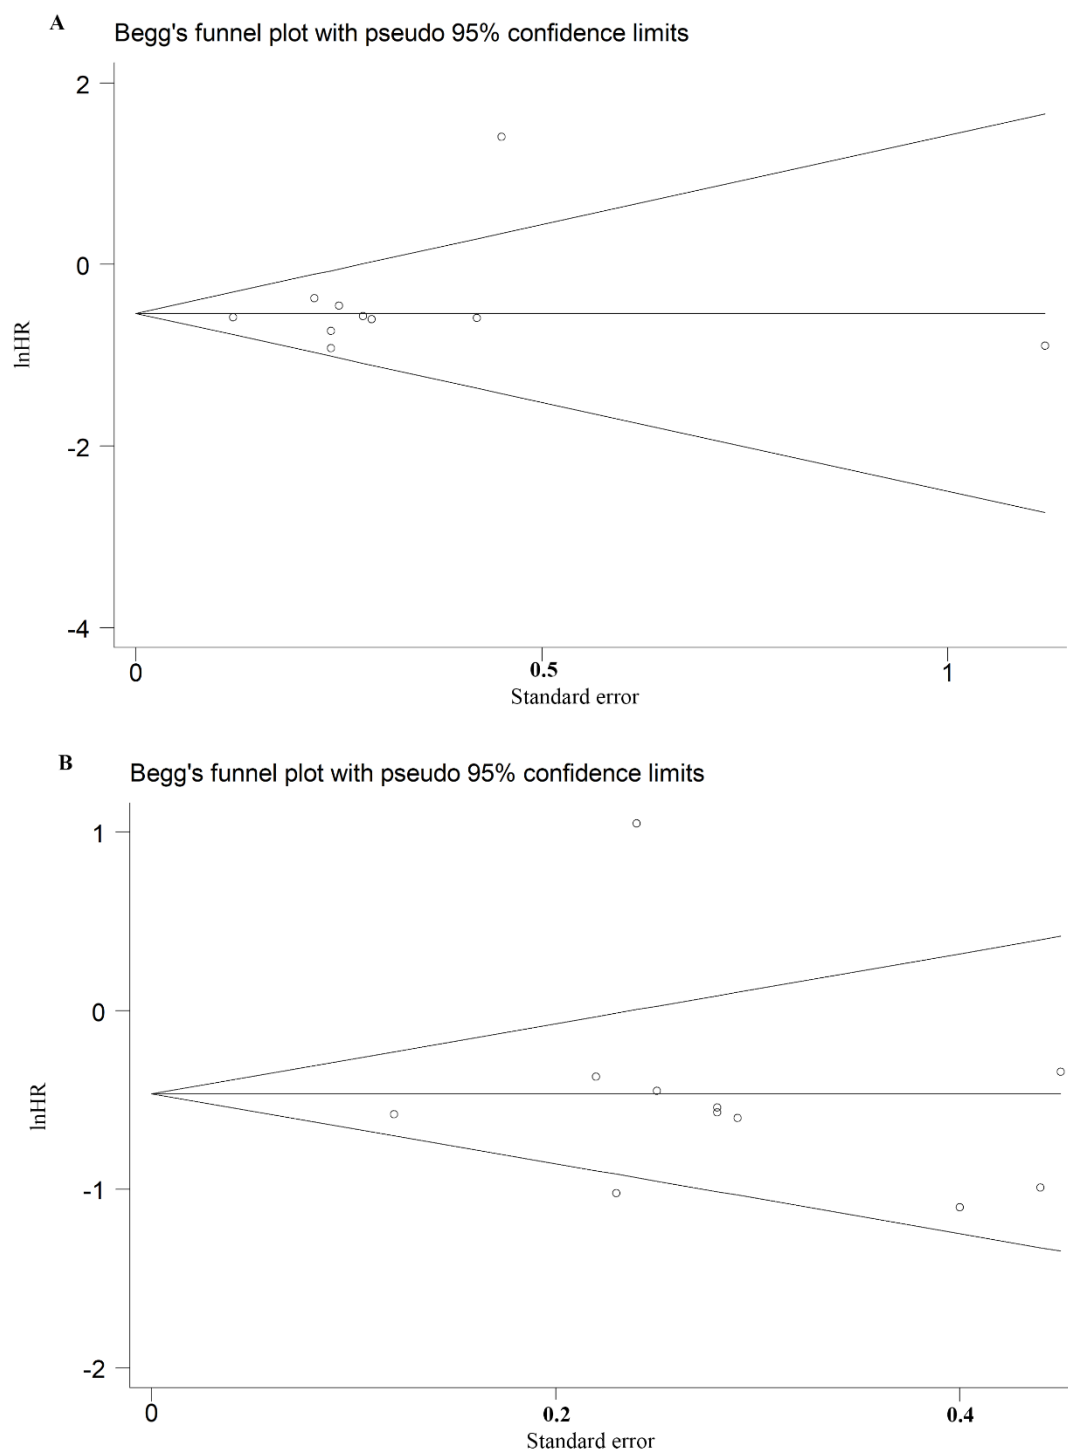

**Supplementary Figure S2. Funnel plots of the overall survival (A) and progression-free survival (B)**
